# Supplementary material for: Deep phenotyping of 34,128 adult patients hospitalised with COVID-19 in an international network study
Source: PubMed Central journal article supplement (PMC7538555; doi:10.1038/s41467-020-18849-z), 2020-10-06
Supplement: 41467_2020_18849_MOESM1_ESM.pdf [file 41467_2020_18849_MOESM1_ESM.pdf]

# Supplementary Information

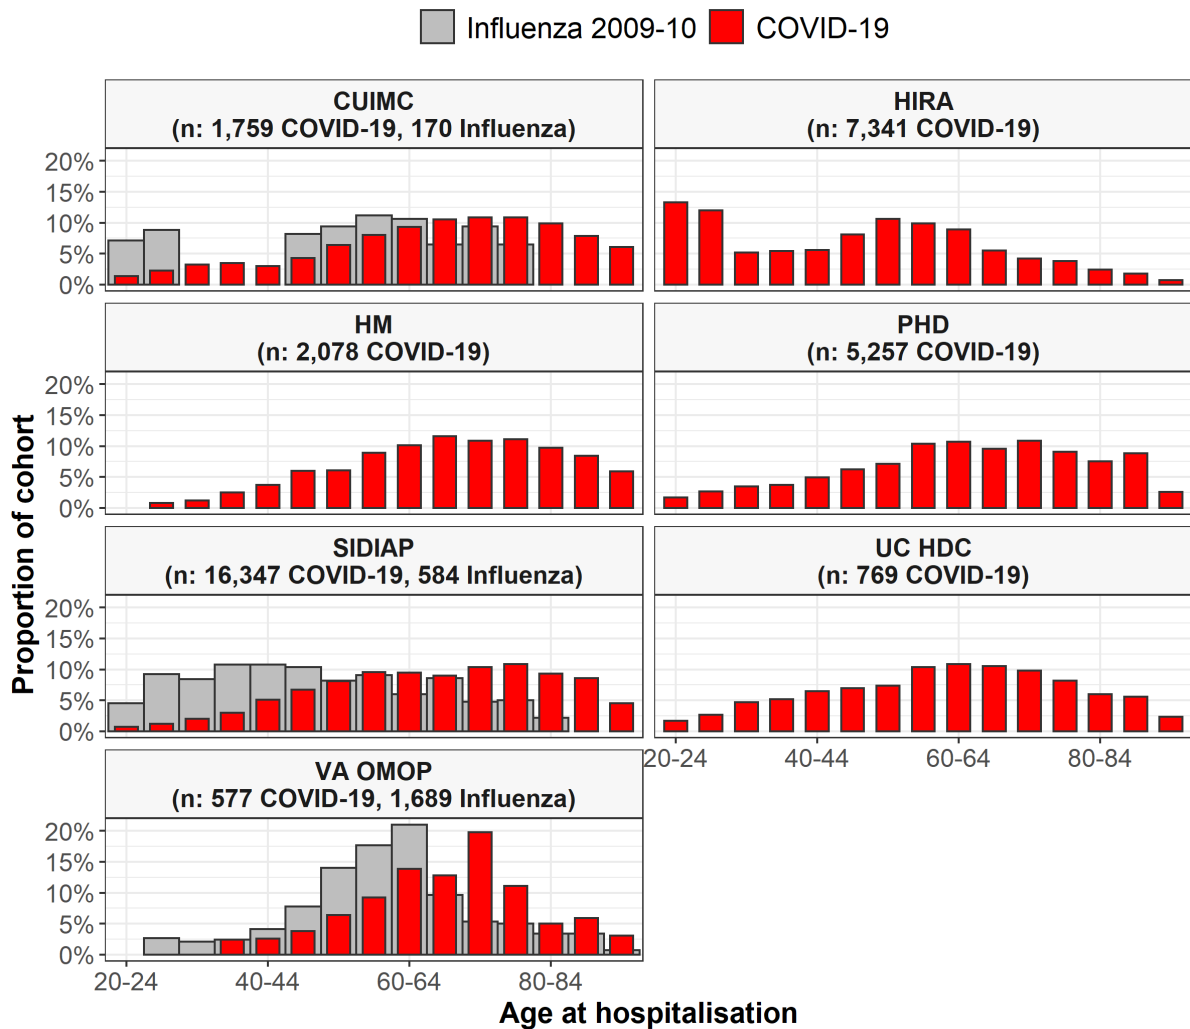

**Supplementary Figure 1. Age of patients hospitalised with COVID-19 and of patients hospitalised with influenza**

Individuals hospitalised with COVID-19 between December 2019 and April 2020 compared with those hospitalised with influenza between September 2009 to April 2010. Proportion of cohorts by 5-year age groups, with counts of less than 10 omitted. CUIMC: Columbia University Irving Medical Center; HIRA: Health Insurance Review & Assessment; HM: HM Hospitales; PHD: Premier Healthcare Database; SIDIAP: The Information System for Research in Primary Care; UC HDC: University of Colorado Health Data Compass; VA OMOP: Department of Veterans Affairs.

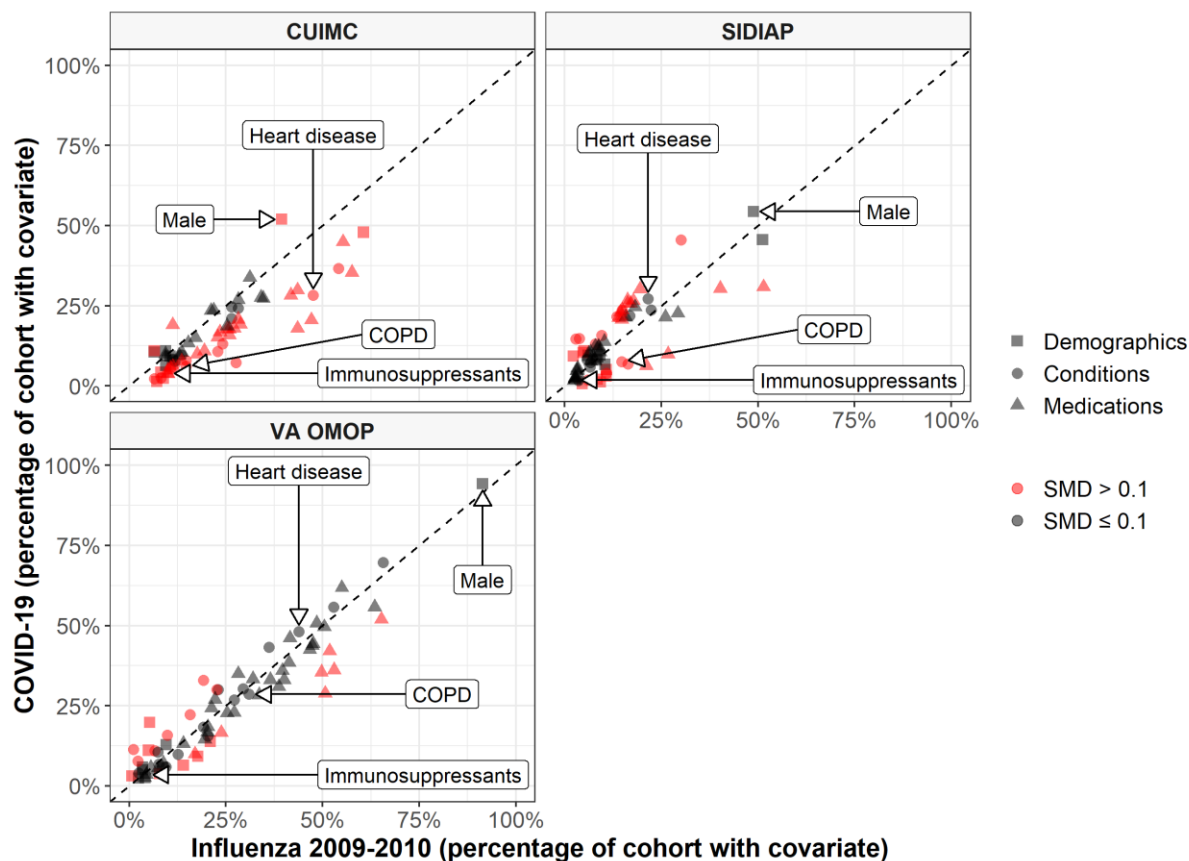

## Supplementary Figure 2. Characteristics of COVID-19 patients compared to 2009-2010 Influenza patients

The plot compares demographics (age and sex), conditions (recorded over the year prior and up to day of hospitalisation), and medications (1) from a year prior up to, and including, day of hospitalisation, 2) from 30 days prior up to, and including, day of hospitalisation, and 3) on day of hospitalisation). Each dot represents one of these covariates with the colour indicating the absolute value of the standardised mean difference (SMD), with a SMD above 0.1 taken to indicate a difference in the prevalence of a particular covariate. The proportion male, with heart disease, with chronic obstructive pulmonary disease (COPD) and taking immunosuppressants (over the 30 days prior up to, and including, day of hospitalisation) are shown for illustration. CUIMC: Columbia University Irving Medical Center; SIDIAP: The Information System for Research in Primary Care; VA OMOP: Department of Veterans Affairs.

Supplementary Table 1. Characteristics of individuals hospitalised with COVID-19 compared with those hospitalised with influenza in 2015-2019

|                  | CUIM<br>C<br>COVID<br>-19 | CUIMC<br>Influenz<br>a 2014-<br>19 | CUIM<br>C<br>SMD | PHD<br>COVID<br>-19 | PHD<br>Influenz<br>a 2014-<br>19 | PHD<br>SM<br>D | SIDIAP<br>COVID<br>-19 | SIDIAP<br>Influenz<br>a 2014-<br>19 | SIDIA<br>P<br>SMD | UC<br>HDC<br>COVID<br>-19 | UC HDC<br>Influenz<br>a 2014-<br>19 | UC<br>HDC<br>SM<br>D | VA<br>OMOP<br>COVID<br>-19 | VA<br>OMOP<br>Influenz<br>a 2014-<br>19 | VA<br>OMO<br>P<br>SMD |
|------------------|---------------------------|------------------------------------|------------------|---------------------|----------------------------------|----------------|------------------------|-------------------------------------|-------------------|---------------------------|-------------------------------------|----------------------|----------------------------|-----------------------------------------|-----------------------|
| sex: male        | 52.0%                     | 43.1%                              | 0.09             | 52.4%               | 44.1%                            | 0.08           | 54.4%                  | 52.9%                               | 0.01              | 53.7%                     | 44.9%                               | 0.09                 | 94.3%                      | 94.1%                                   | 0.00                  |
| sex: female      | 47.9%                     | 56.9%                              | -0.09            | 47.6%               | 55.9%                            | -0.08          | 45.6%                  | 47.1%                               | -0.02             | 46.3%                     | 54.9%                               | -0.09                | 5.7%                       | 5.9%                                    | -0.01                 |
| age group: 15-19 | <0.6%                     | 1.2%                               |                  | 0.4%                | 0.4%                             | 0.00           | 0.1%                   | 0.6%                                | -0.06             |                           | 0.4%                                |                      |                            |                                         |                       |
| age group: 20-24 | 1.4%                      | 3.2%                               | -0.08            | 1.7%                | 1.5%                             | 0.01           | 0.7%                   | 1.3%                                | -0.04             | 1.7%                      | 2.6%                                | -0.04                | <1.7%                      |                                         |                       |
| age group: 25-29 | 2.3%                      | 4.0%                               | -0.07            | 2.7%                | 2.2%                             | 0.02           | 1.2%                   | 2.0%                                | -0.04             | 2.7%                      | 3.4%                                | -0.03                | <1.7%                      | 0.4%                                    |                       |
| age group: 30-34 | 3.2%                      | 3.8%                               | -0.02            | 3.5%                | 2.4%                             | 0.05           | 2.0%                   | 2.7%                                | -0.03             | 4.7%                      | 3.6%                                | 0.04                 | <1.7%                      | 0.8%                                    |                       |
| age group: 35-39 | 3.5%                      | 3.1%                               | 0.02             | 3.7%                | 2.6%                             | 0.04           | 3.0%                   | 3.9%                                | -0.03             | 5.2%                      | 3.9%                                | 0.04                 | 2.4%                       | 1.0%                                    | 0.08                  |
| age group: 40-44 | 3.0%                      | 3.0%                               | 0.00             | 4.9%                | 2.9%                             | 0.07           | 5.1%                   | 4.9%                                | 0.01              | 6.5%                      | 3.9%                                | 0.08                 | 2.6%                       | 1.1%                                    | 0.08                  |
| age group: 45-49 | 4.3%                      | 3.8%                               | 0.02             | 6.2%                | 4.3%                             | 0.06           | 6.7%                   | 5.3%                                | 0.04              | 7.0%                      | 4.9%                                | 0.06                 | 3.8%                       | 2.1%                                    | 0.07                  |
| age group: 50-54 | 6.4%                      | 5.8%                               | 0.02             | 7.1%                | 5.9%                             | 0.03           | 8.1%                   | 6.0%                                | 0.06              | 7.4%                      | 6.2%                                | 0.03                 | 6.4%                       | 3.7%                                    | 0.09                  |
| age group: 55-59 | 8.0%                      | 6.6%                               | 0.04             | 10.4%               | 9.3%                             | 0.02           | 9.6%                   | 7.0%                                | 0.06              | 10.4%                     | 8.5%                                | 0.04                 | 9.2%                       | 7.5%                                    | 0.04                  |

|                            |       |       |       |       |       |       |       |       |       |       |       |       |       |       |       |
|----------------------------|-------|-------|-------|-------|-------|-------|-------|-------|-------|-------|-------|-------|-------|-------|-------|
| age group: 60-64           | 9.3%  | 8.6%  | 0.02  | 10.7% | 11.2% | -0.01 | 9.5%  | 7.4%  | 0.05  | 10.9% | 10.6% | 0.01  | 13.9% | 12.4% | 0.03  |
| age group: 65-69           | 10.5% | 9.8%  | 0.02  | 9.6%  | 10.9% | -0.03 | 9.0%  | 9.5%  | -0.01 | 10.5% | 11.0% | -0.01 | 12.8% | 19.1% | -0.11 |
| age group: 70-74           | 10.9% | 9.3%  | 0.04  | 10.9% | 11.9% | -0.02 | 10.4% | 10.9% | -0.01 | 9.8%  | 10.0% | 0.00  | 19.8% | 19.7% | 0.00  |
| age group: 75-79           | 10.9% | 10.3% | 0.01  | 9.1%  | 11.2% | -0.05 | 10.9% | 10.7% | 0.00  | 8.2%  | 8.9%  | -0.02 | 11.1% | 9.6%  | 0.03  |
| age group: 80-84           | 9.9%  | 9.7%  | 0.00  | 7.5%  | 9.5%  | -0.05 | 9.3%  | 12.6% | -0.07 | 6.0%  | 8.6%  | -0.07 | 5.0%  | 8.2%  | -0.09 |
| age group: 85-89           | 7.9%  | 8.1%  | 0.00  | 8.8%  | 13.8% | -0.11 | 8.6%  | 8.7%  | 0.00  | 5.6%  | 6.6%  | -0.03 | 5.9%  | 7.3%  | -0.04 |
| age group: 90-94           | 6.1%  | 6.5%  | -0.01 | 2.6%  | 0.1%  | 0.15  | 4.5%  | 5.2%  | -0.02 | 2.3%  | 5.1%  | -0.10 | 3.1%  | 5.3%  | -0.08 |
| age group: 95-99           | 1.8%  | 2.4%  | -0.03 |       |       |       | 1.2%  | 1.2%  | 0.00  | <1.3% | 1.3%  |       | <1.7% | 1.6%  |       |
| age group: 00-04           | <0.6% | 0.6%  |       |       |       |       | 0.1%  | <0.3% |       | <1.3% | <0.3% |       |       | 0.1%  |       |
| age group: 05-10           |       |       |       |       |       |       |       |       |       |       |       |       |       |       |       |
| Charlson comorbidity index | 4.0   | 5.7   | -0.29 | 3.1   | 3.1   | 0.00  | 1.5   | 3.5   | -0.59 | 3.5   | 4.3   | -0.16 | 5.4   | 5.9   | -0.09 |
| Anemia                     | 13.1% | 25.5% | -0.20 | 30.2% | 26.8% | 0.05  | 14.6% |       |       | 29.9% | 37.6% | -0.09 | 30.0% | 27.3% | 0.04  |
| Anxiety disorder           | 5.5%  | 9.7%  | -0.11 | 18.0% | 18.6% | -0.01 | 23.7% | 20.2% | 0.05  | 18.2% | 26.9% | -0.13 | 30.3% | 29.0% | 0.02  |
| Asthma                     | 7.2%  | 21.2% | -0.26 | 14.6% | 14.0% | 0.01  | 6.9%  | 12.2% | -0.12 | 13.8% | 24.3% | -0.17 | 9.9%  | 8.3%  | 0.04  |
| Atrial fibrillation        | 8.4%  | 20.0% | -0.22 | 18.1% | 22.6% | -0.07 | 8.2%  | 16.4% | -0.17 | 12.0% | 18.1% | -0.11 | 15.8% | 20.8% | -0.08 |
| Chronic liver disease      | 2.6%  | 5.2%  | -0.09 | 3.0%  | 2.8%  | 0.01  | 1.9%  | 7.0%  | -0.17 | 2.3%  | 5.3%  | -0.11 | 6.8%  | 7.5%  | -0.02 |
| COPD                       | 6.1%  | 18.3% | -0.25 | 24.5% | 36.6% | -0.15 | 7.6%  | 23.2% | -0.28 | 12.6% | 31.1% | -0.28 | 28.6% | 43.0% | -0.17 |

|                                 |       |       |       |       |       |       |       |       |       |       |       |       |       |       |       |
|---------------------------------|-------|-------|-------|-------|-------|-------|-------|-------|-------|-------|-------|-------|-------|-------|-------|
| Dementia                        | 8.5%  | 9.4%  | -0.02 | 9.2%  | 9.9%  | -0.02 | 5.6%  | 5.3%  | 0.01  | 7.4%  | 8.1%  | -0.02 | 7.8%  | 10.2% | -0.06 |
| Diabetes mellitus               | 24.2% | 32.2% | -0.11 | 35.8% | 34.0% | 0.02  | 21.6% | 29.3% | -0.11 | 35.2% | 31.8% | 0.04  | 43.3% | 43.1% | 0.00  |
| Gastroesophageal reflux disease | 9.6%  | 16.4% | -0.13 | 24.8% | 25.2% | -0.01 | 9.5%  | 6.2%  | 0.08  | 23.4% | 35.0% | -0.15 | 26.9% | 29.1% | -0.03 |
| Heart disease                   | 28.3% | 53.0% | -0.27 | 48.6% | 54.2% | -0.06 | 27.1% | 49.1% | -0.25 | 39.0% | 55.8% | -0.17 | 48.2% | 58.2% | -0.10 |
| Heart failure                   | 10.7% | 25.8% | -0.25 | 24.8% | 28.1% | -0.05 | 5.9%  | 20.0% | -0.28 | 12.9% | 23.1% | -0.17 | 22.2% | 25.7% | -0.05 |
| Hyperlipidemia                  | 24.7% | 33.1% | -0.11 | 46.0% | 45.1% | 0.01  | 23.7% | 39.8% | -0.20 | 38.0% | 43.0% | -0.06 | 55.8% | 58.5% | -0.03 |
| Hypertensive disorder           | 36.6% | 50.6% | -0.15 | 47.1% | 41.1% | 0.06  | 45.6% | 55.8% | -0.10 | 57.3% | 62.5% | -0.05 | 69.7% | 71.8% | -0.02 |
| Insomnia                        | 3.1%  | 5.6%  | -0.08 | 4.4%  | 3.3%  | 0.04  | 14.6% | 12.6% | 0.04  | 7.4%  | 10.4% | -0.07 | 10.9% | 9.9%  | 0.02  |
| Ischemic heart disease          | 8.0%  | 15.2% | -0.15 | 16.0% | 16.8% | -0.01 | 7.3%  | 17.1% | -0.20 | 13.5% | 17.5% | -0.07 | 15.6% | 21.3% | -0.09 |
| Low back pain                   | 6.8%  | 8.9%  | -0.05 | 5.0%  | 2.7%  | 0.08  | 21.9% | 25.7% | -0.06 | 11.1% | 14.0% | -0.06 | 30.0% | 26.4% | 0.05  |
| Malignant neoplastic disease    | 7.7%  | 17.5% | -0.20 | 9.4%  | 8.5%  | 0.02  | 15.8% | 23.5% | -0.12 | 10.8% | 19.3% | -0.15 | 18.4% | 21.4% | -0.05 |
| Osteoarthritis of knee          | 4.6%  | 4.4%  | 0.01  | 2.0%  | 1.3%  | 0.04  | 14.8% | 11.9% | 0.06  | 5.1%  | 4.7%  | 0.01  | 11.4% | 6.6%  | 0.11  |
| Osteoarthritis of hip           | 3.0%  | 3.2%  | -0.01 | 1.1%  | 0.5%  | 0.05  | 5.1%  | 3.8%  | 0.04  | 2.6%  | 2.1%  | 0.02  | 2.8%  | 1.8%  | 0.05  |
| Peripheral vascular disease     | 4.7%  | 5.9%  | -0.04 | 7.5%  | 6.2%  | 0.04  | 3.9%  | 24.8% | -0.39 | 7.4%  | 6.9%  | 0.01  | 10.6% | 12.7% | -0.04 |
| Renal impairment                | 21.1% | 34.9% | -0.18 | 37.5% | 36.9% | 0.01  | 13.1% | 26.9% | -0.22 | 37.2% | 39.5% | -0.03 | 32.9% | 32.2% | 0.01  |

|                                                                                          |       |       |       |       |       |       |       |       |       |       |       |       |       |       |       |
|------------------------------------------------------------------------------------------|-------|-------|-------|-------|-------|-------|-------|-------|-------|-------|-------|-------|-------|-------|-------|
| Venous thrombosis                                                                        | 2.3%  | 7.7%  | -0.17 | 2.0%  | 1.8%  | 0.01  | 1.5%  | 2.6%  | -0.05 | 6.6%  | 7.7%  | -0.03 | 4.0%  | 4.0%  | 0.00  |
| Viral hepatitis                                                                          | 2.3%  | 3.9%  | -0.06 | 2.5%  | 2.4%  | 0.00  | 1.7%  | 4.8%  | -0.12 | 2.6%  | 3.9%  | -0.05 | 5.9%  | 6.3%  | -0.01 |
| Antineoplastic and immunomodulating agents (year up to, and including, index date)       | 9.6%  | 21.3% | -0.21 | 3.8%  | 2.6%  | 0.05  | 3.4%  | 8.9%  | -0.16 | 12.9% | 23.0% | -0.17 | 13.2% | 13.5% | -0.01 |
| Antineoplastic and immunomodulating agents (30 days up to, and including, index date)    | 6.1%  | 17.0% | -0.23 | 2.6%  | 2.4%  | 0.01  | 2.7%  | 7.7%  | -0.15 | 9.6%  | 18.3% | -0.16 | 7.1%  | 8.5%  | -0.04 |
| Antineoplastic and immunomodulating agents (on index date)                               | 4.9%  | 15.0% | -0.23 | 2.1%  | 2.0%  | 0.00  | 2.5%  | 7.6%  | -0.16 | 8.2%  | 16.7% | -0.17 | 4.9%  | 6.7%  | -0.05 |
| Agents acting on the renin-angiotensin system (year up to, and including, index date)    | 27.3% | 36.3% | -0.11 | 15.3% | 12.7% | 0.05  | 30.2% | 38.2% | -0.10 | 39.8% | 40.9% | -0.01 | 49.6% | 50.8% | -0.01 |
| Agents acting on the renin-angiotensin system (30 days up to, and including, index date) | 18.0% | 25.1% | -0.11 | 8.8%  | 11.8% | -0.07 | 26.6% | 33.7% | -0.09 | 33.0% | 35.8% | -0.03 | 38.5% | 41.0% | -0.03 |
| Agents acting on the renin-angiotensin system (on index date)                            | 15.9% | 23.8% | -0.13 | 7.4%  | 11.0% | -0.08 | 25.7% | 32.5% | -0.09 | 31.5% | 34.9% | -0.04 | 33.1% | 38.8% | -0.07 |

|                                                                                        |       |       |       |       |       |       |       |       |       |       |       |       |       |       |       |
|----------------------------------------------------------------------------------------|-------|-------|-------|-------|-------|-------|-------|-------|-------|-------|-------|-------|-------|-------|-------|
| Antiepileptics (year up to, and including, index date)                                 | 19.0% | 24.9% | -0.09 | 16.7% | 15.9% | 0.01  | 10.6% | 15.3% | -0.09 | 27.2% | 33.0% | -0.07 | 33.4% | 37.4% | -0.05 |
| Antiepileptics (30 days up to, and including, index date)                              | 9.9%  | 17.0% | -0.14 | 12.2% | 15.3% | -0.06 | 8.1%  | 12.1% | -0.09 | 21.6% | 27.1% | -0.08 | 22.7% | 30.0% | -0.10 |
| Antiepileptics (on index date)                                                         | 9.1%  | 15.7% | -0.13 | 11.3% | 14.8% | -0.07 | 7.7%  | 11.7% | -0.09 | 20.2% | 26.5% | -0.09 | 16.6% | 28.4% | -0.18 |
| Antiinflammatory and antirheumatic products (year up to index date)                    | 23.6% | 34.2% | -0.14 | 17.5% | 14.9% | 0.05  | 30.9% | 34.8% | -0.05 | 52.9% | 74.8% | -0.19 | 46.1% | 36.0% | 0.11  |
| Antiinflammatory and antirheumatic products (30 days up to, and including, index date) | 10.5% | 20.0% | -0.17 | 10.2% | 14.2% | -0.08 | 9.9%  | 15.1% | -0.10 | 38.6% | 62.3% | -0.24 | 16.8% | 17.3% | -0.01 |
| Antiinflammatory and antirheumatic products (on index date)                            | 7.8%  | 17.1% | -0.19 | 7.9%  | 12.3% | -0.10 | 6.3%  | 11.1% | -0.12 | 35.1% | 59.3% | -0.25 | 9.9%  | 13.2% | -0.07 |
| Antithrombotic agents (year up to, and including, index date)                          | 44.9% | 75.0% | -0.27 | 50.1% | 49.0% | 0.01  | 25.7% | 39.1% | -0.17 | 72.0% | 75.9% | -0.03 | 55.8% | 72.0% | -0.14 |
| Antithrombotic agents (30 days up to, and including, index date)                       | 29.9% | 64.8% | -0.36 | 40.4% | 47.7% | -0.08 | 21.9% | 35.0% | -0.17 | 67.5% | 68.4% | -0.01 | 42.1% | 61.4% | -0.19 |

|                                                                     |       |       |       |       |       |       |       |       |       |       |       |       |       |       |       |
|---------------------------------------------------------------------|-------|-------|-------|-------|-------|-------|-------|-------|-------|-------|-------|-------|-------|-------|-------|
| Antithrombotic agents (on index date)                               | 28.3% | 63.5% | -0.37 | 38.4% | 46.7% | -0.09 | 21.3% | 34.3% | -0.17 | 66.8% | 67.3% | 0.00  | 35.5% | 59.0% | -0.24 |
| Beta blocking agents (year up to, and including, index date)        | 26.9% | 39.5% | -0.15 | 26.7% | 25.7% | 0.01  | 13.8% | 22.9% | -0.15 | 32.8% | 42.7% | -0.11 | 44.4% | 53.3% | -0.09 |
| Beta blocking agents (30 days up to, and including, index date)     | 16.8% | 31.0% | -0.21 | 19.3% | 24.6% | -0.08 | 12.4% | 20.3% | -0.14 | 24.7% | 35.6% | -0.14 | 36.0% | 46.0% | -0.11 |
| Beta blocking agents (on index date)                                | 15.2% | 29.9% | -0.22 | 17.8% | 23.8% | -0.09 | 11.9% | 19.7% | -0.14 | 23.8% | 34.4% | -0.14 | 31.0% | 44.5% | -0.16 |
| Calcium channel blockers (year up to, and including, index date)    | 23.5% | 32.5% | -0.12 | 17.4% | 15.0% | 0.04  | 12.4% | 18.9% | -0.12 | 24.3% | 27.8% | -0.05 | 35.0% | 34.4% | 0.01  |
| Calcium channel blockers (30 days up to, and including, index date) | 15.0% | 22.5% | -0.12 | 11.1% | 14.2% | -0.06 | 10.5% | 15.5% | -0.10 | 20.5% | 22.2% | -0.03 | 27.0% | 26.8% | 0.00  |
| Calcium channel blockers (on index date)                            | 13.4% | 21.1% | -0.13 | 9.7%  | 13.4% | -0.08 | 10.1% | 15.0% | -0.10 | 19.9% | 21.3% | -0.02 | 24.3% | 25.5% | -0.02 |
| Diuretics (year up to, and including, index date)                   | 27.6% | 42.4% | -0.18 | 22.7% | 19.4% | 0.05  | 24.6% | 38.9% | -0.18 | 33.3% | 42.8% | -0.11 | 42.6% | 47.1% | -0.05 |
| Diuretics (30 days up to, and including, index date)                | 19.2% | 32.2% | -0.18 | 15.6% | 18.2% | -0.04 | 21.5% | 34.4% | -0.17 | 27.4% | 35.6% | -0.10 | 33.1% | 37.1% | -0.05 |



|                                                                             |       |       |       |       |       |       |       |       |       |       |       |       |       |       |       |
|-----------------------------------------------------------------------------|-------|-------|-------|-------|-------|-------|-------|-------|-------|-------|-------|-------|-------|-------|-------|
| Diuretics (on index date)                                                   | 17.7% | 30.2% | -0.18 | 14.1% | 17.2% | -0.06 | 20.7% | 33.6% | -0.17 | 26.4% | 34.6% | -0.10 | 28.4% | 34.7% | -0.08 |
| Drugs for acid related disorders (year up to, and including, index date)    | 35.4% | 60.0% | -0.25 | 34.5% | 31.4% | 0.04  | 30.4% | 60.3% | -0.31 | 53.6% | 67.7% | -0.13 | 52.0% | 60.7% | -0.08 |
| Drugs for acid related disorders (30 days up to, and including, index date) | 20.6% | 45.2% | -0.30 | 23.7% | 30.0% | -0.09 | 22.7% | 51.6% | -0.34 | 44.5% | 58.7% | -0.14 | 36.2% | 47.5% | -0.12 |
| Drugs for acid related disorders (on index date)                            | 17.9% | 42.5% | -0.32 | 21.8% | 28.5% | -0.09 | 21.5% | 50.5% | -0.34 | 42.4% | 56.8% | -0.14 | 28.9% | 44.8% | -0.19 |
| Immunosuppressants (year up to, and including, index date)                  | 5.6%  | 13.4% | -0.18 | 2.2%  | 1.4%  | 0.04  | 2.3%  | 7.0%  | -0.15 | 7.5%  | 11.5% | -0.09 | 5.7%  | 5.4%  | 0.01  |
| Immunosuppressants (30 days up to, and including, index date)               | 3.9%  | 11.5% | -0.19 | 1.6%  | 1.3%  | 0.02  | 1.9%  | 6.3%  | -0.15 | 6.1%  | 9.6%  | -0.09 | 3.5%  | 4.1%  | -0.02 |
| Immunosuppressants (on index date)                                          | 3.7%  | 10.7% | -0.18 | 1.5%  | 1.3%  | 0.01  | 1.7%  | 6.2%  | -0.16 | 5.9%  | 9.3%  | -0.09 | 2.6%  | 3.7%  | -0.04 |
| Insulins and analogues (year up to, and including, index date)              | 17.8% | 31.7% | -0.20 | 19.2% | 18.0% | 0.02  | 5.5%  | 11.0% | -0.14 | 31.9% | 28.8% | 0.04  | 22.9% | 30.0% | -0.10 |
| Insulins and analogues (30 days up to, and including, index date)           | 10.9% | 22.3% | -0.20 | 13.9% | 17.3% | -0.06 | 4.9%  | 10.5% | -0.14 | 26.9% | 24.7% | 0.03  | 18.4% | 24.0% | -0.09 |

|                                                                   |       |       |       |       |       |       |       |       |       |       |       |       |       |       |       |
|-------------------------------------------------------------------|-------|-------|-------|-------|-------|-------|-------|-------|-------|-------|-------|-------|-------|-------|-------|
| Insulins and analogues (on index date)                            | 9.9%  | 21.2% | -0.20 | 13.1% | 16.7% | -0.07 | 4.7%  | 10.3% | -0.14 | 25.4% | 23.9% | 0.02  | 14.6% | 22.6% | -0.13 |
| Lipid modifying agents (year up to, and including, index date)    | 33.8% | 43.6% | -0.11 | 27.6% | 27.2% | 0.01  | 26.8% | 36.3% | -0.12 | 41.7% | 43.6% | -0.02 | 61.9% | 63.5% | -0.01 |
| Lipid modifying agents (30 days up to, and including, index date) | 20.8% | 35.2% | -0.19 | 21.0% | 26.4% | -0.08 | 23.6% | 32.8% | -0.12 | 36.4% | 39.1% | -0.03 | 50.8% | 54.5% | -0.04 |
| Lipid modifying agents (on index date)                            | 18.7% | 34.0% | -0.21 | 19.9% | 25.8% | -0.09 | 23.0% | 32.4% | -0.13 | 35.6% | 38.2% | -0.03 | 43.8% | 52.7% | -0.09 |

CUIMC: Columbia University Irving Medical Center; HIRA: Health Insurance Review & Assessment; HM: HM Hospitales; PHD: Premier Healthcare Database; SIDIAP: The Information System for Research in Primary Care; UC HDC: University of Colorado Health Data Compass; VA OMOP: Department of Veterans Affairs. COPD: Chronic obstructive pulmonary disease; GERD: Gastroesophageal reflux disease. Exact proportions have not been reported where counts were less than 10.

Supplementary Table 2. Characteristics of individuals hospitalised with COVID-19 compared with those hospitalised with influenza in 2009-2010

|                  | CUIMC<br>COVID-19 | CUIMC<br>Influenza<br>2009-10 | CUIMC<br>SMD | SIDIAP<br>COVID-19 | SIDIAP<br>Influenza<br>2009-10 | SIDIAP<br>SMD | VA OMOP<br>COVID-19 | VA OMOP<br>Influenza 2009-<br>10 | VA<br>OMOP<br>SMD |
|------------------|-------------------|-------------------------------|--------------|--------------------|--------------------------------|---------------|---------------------|----------------------------------|-------------------|
| sex: male        | 52.0%             | 39.4%                         | 0.13         | 54.4%              | 48.8%                          | 0.06          | 94.3%               | 91.4%                            | 0.02              |
| sex: female      | 47.9%             | 60.6%                         | -0.12        | 45.6%              | 51.2%                          | -0.06         | 5.7%                | 8.6%                             | -0.08             |
| age group: 15-19 | <0.6%             | <5.9%                         |              | 0.1%               | <1.7%                          |               |                     |                                  |                   |
| age group: 20-24 | 1.4%              | 7.1%                          | -0.20        | 0.7%               | 4.5%                           | -0.17         | <1.7%               | <0.6%                            |                   |
| age group: 25-29 | 2.3%              | 8.8%                          | -0.19        | 1.2%               | 9.2%                           | -0.25         | <1.7%               | 2.7%                             |                   |
| age group: 30-34 | 3.2%              | <5.9%                         |              | 2.0%               | 8.4%                           | -0.20         | <1.7%               | 2.1%                             |                   |
| age group: 35-39 | 3.5%              | <5.9%                         |              | 3.0%               | 10.8%                          | -0.21         | 2.4%                | 2.4%                             | 0.00              |
| age group: 40-44 | 3.0%              | <5.9%                         |              | 5.1%               | 10.8%                          | -0.14         | 2.6%                | 4.1%                             | -0.06             |
| age group: 45-49 | 4.3%              | 8.2%                          | -0.11        | 6.7%               | 10.4%                          | -0.09         | 3.8%                | 7.8%                             | -0.12             |
| age group: 50-54 | 6.4%              | 9.4%                          | -0.08        | 8.1%               | 8.2%                           | 0.00          | 6.4%                | 14.0%                            | -0.17             |
| age group: 55-59 | 8.0%              | 11.2%                         | -0.07        | 9.6%               | 9.1%                           | 0.01          | 9.2%                | 17.7%                            | -0.16             |
| age group: 60-64 | 9.3%              | 10.6%                         | -0.03        | 9.5%               | 6.0%                           | 0.09          | 13.9%               | 21.0%                            | -0.12             |
| age group: 65-69 | 10.5%             | 6.5%                          | 0.10         | 9.0%               | 8.6%                           | 0.01          | 12.8%               | 9.6%                             | 0.07              |
| age group: 70-74 | 10.9%             | 9.4%                          | 0.03         | 10.4%              | 4.8%                           | 0.14          | 19.8%               | 5.3%                             | 0.29              |
| age group: 75-79 | 10.9%             | 6.5%                          | 0.11         | 10.9%              | 5.0%                           | 0.15          | 11.1%               | 5.0%                             | 0.15              |
| age group: 80-84 | 9.9%              | <5.9%                         |              | 9.3%               | 2.2%                           | 0.21          | 5.0%                | 3.4%                             | 0.06              |
| age group: 85-89 | 7.9%              | <5.9%                         |              | 8.6%               | <1.7%                          |               | 5.9%                | 3.4%                             | 0.08              |
| age group: 90-94 | 6.1%              | <5.9%                         |              | 4.5%               | <1.7%                          |               | 3.1%                | 0.7%                             | 0.12              |
| age group: 95-99 | 1.8%              | <5.9%                         |              | 1.2%               |                                |               | <1.7%               | <0.6%                            |                   |
| age group: 00-04 | <0.6%             | <5.9%                         |              | 0.1%               |                                |               |                     |                                  |                   |
| age group: 05-10 |                   |                               |              |                    |                                |               |                     |                                  |                   |
| charlson index   | 4.0               | 4.8                           | -0.13        | 1.5                | 1.6                            | -0.03         | 5.4                 | 4.2                              | 0.24              |

|                                                                       |       |       |       |       |       |       |       |       |       |
|-----------------------------------------------------------------------|-------|-------|-------|-------|-------|-------|-------|-------|-------|
| Anemia                                                                | 13.1% | 24.1% | -0.18 | 14.6% |       |       | 30.0% | 23.0% | 0.10  |
| Anxiety disorder                                                      | 5.5%  | 10.6% | -0.13 | 23.7% | 14.9% | 0.14  | 30.3% | 29.4% | 0.01  |
| Asthma                                                                | 7.2%  | 27.6% | -0.35 | 6.9%  | 16.4% | -0.20 | 9.9%  | 12.6% | -0.06 |
| Atrial fibrillation                                                   | 8.4%  | 11.2% | -0.06 | 8.2%  | 5.8%  | 0.06  | 15.8% | 9.9%  | 0.12  |
| Chronic liver disease                                                 | 2.6%  | 8.2%  | -0.17 | 1.9%  | 6.0%  | -0.15 | 6.8%  | 7.6%  | -0.02 |
| COPD                                                                  | 6.1%  | 14.7% | -0.19 | 7.6%  | 14.7% | -0.15 | 28.6% | 31.0% | -0.03 |
| Dementia                                                              | 8.5%  | <5.9% |       | 5.6%  | <1.7% |       | 7.8%  | 2.2%  | 0.18  |
| Diabetes mellitus                                                     | 24.2% | 28.2% | -0.06 | 21.6% | 13.5% | 0.14  | 43.3% | 36.1% | 0.08  |
| Gastroesophageal reflux disease                                       | 9.6%  | 13.5% | -0.08 | 9.5%  | <1.7% |       | 26.9% | 27.2% | 0.00  |
| Heart disease                                                         | 28.3% | 47.6% | -0.22 | 27.1% | 21.6% | 0.08  | 48.2% | 43.9% | 0.04  |
| Heart failure                                                         | 10.7% | 22.9% | -0.21 | 5.9%  | 6.5%  | -0.02 | 22.2% | 15.7% | 0.11  |
| Hyperlipidemia                                                        | 24.7% | 26.5% | -0.03 | 23.7% | 22.4% | 0.02  | 55.8% | 52.9% | 0.03  |
| Hypertensive disorder                                                 | 36.6% | 54.1% | -0.18 | 45.6% | 30.1% | 0.18  | 69.7% | 65.7% | 0.03  |
| Insomnia                                                              | 3.1%  | <5.9% |       | 14.6% | 2.9%  | 0.28  | 10.9% | 6.6%  | 0.10  |
| Ischemic heart disease                                                | 8.0%  | 14.7% | -0.14 | 7.3%  | 6.7%  | 0.02  | 15.6% | 20.3% | -0.08 |
| Low back pain                                                         | 6.8%  | 11.8% | -0.12 | 21.9% | 16.8% | 0.08  | 30.0% | 22.6% | 0.10  |
| Malignant neoplastic disease                                          | 7.7%  | 11.8% | -0.09 | 15.8% | 9.6%  | 0.12  | 18.4% | 19.2% | -0.01 |
| Osteoarthritis of knee                                                | 4.6%  | <5.9% |       | 14.8% | 3.8%  | 0.26  | 11.4% | 1.1%  | 0.29  |
| Osteoarthritis of hip                                                 | 3.0%  |       |       | 5.1%  | <1.7% |       | 2.8%  |       |       |
| Peripheral vascular disease                                           | 4.7%  | <5.9% |       | 3.9%  | 10.8% | -0.18 | 10.6% | 7.4%  | 0.08  |
| Renal impairment                                                      | 21.1% | 26.5% | -0.08 | 13.1% | 7.9%  | 0.11  | 32.9% | 19.2% | 0.19  |
| Venous thrombosis                                                     | 2.3%  | <5.9% |       | 1.5%  | <1.7% |       | 4.0%  | 2.5%  | 0.06  |
| Viral hepatitis                                                       | 2.3%  | 6.5%  | -0.14 | 1.7%  | 3.6%  | -0.08 | 5.9%  | 9.5%  | -0.09 |
| Antineoplastic and immunomodulating agents (year up to index date)    | 9.6%  | 12.9% | -0.07 | 3.4%  | 3.6%  | -0.01 | 13.2% | 14.0% | -0.02 |
| Antineoplastic and immunomodulating agents (30 days up to index date) | 6.1%  | 11.2% | -0.12 | 2.7%  | 2.7%  | 0.00  | 7.1%  | 8.8%  | -0.04 |

|                                                                          |       |       |       |       |       |       |       |       |       |
|--------------------------------------------------------------------------|-------|-------|-------|-------|-------|-------|-------|-------|-------|
| Antineoplastic and immunomodulating agents (on index date)               | 4.9%  | 10.0% | -0.13 | 2.5%  | 2.6%  | 0.00  | 4.9%  | 7.2%  | -0.07 |
| Agents acting on the renin-angiotensin system (year up to index date)    | 27.3% | 34.7% | -0.09 | 30.2% | 19.5% | 0.15  | 49.6% | 50.4% | -0.01 |
| Agents acting on the renin-angiotensin system (30 days up to index date) | 18.0% | 27.1% | -0.14 | 26.6% | 17.8% | 0.13  | 38.5% | 41.3% | -0.03 |
| Agents acting on the renin-angiotensin system (on index date)            | 15.9% | 25.9% | -0.15 | 25.7% | 17.0% | 0.13  | 33.1% | 40.1% | -0.08 |
| Antiepileptics (year up to index date)                                   | 19.0% | 11.2% | 0.14  | 10.6% | 9.1%  | 0.03  | 33.4% | 32.0% | 0.02  |
| Antiepileptics (30 days up to index date)                                | 9.9%  | 9.4%  | 0.01  | 8.1%  | 7.7%  | 0.01  | 22.7% | 25.3% | -0.04 |
| Antiepileptics (on index date)                                           | 9.1%  | 9.4%  | -0.01 | 7.7%  | 6.7%  | 0.03  | 16.6% | 23.8% | -0.11 |
| Antiinflammatory and antirheumatic products (year up to index date)      | 23.6% | 21.8% | 0.03  | 30.9% | 51.4% | -0.23 | 46.1% | 41.6% | 0.05  |
| Antiinflammatory and antirheumatic products (30 days up to index date)   | 10.5% | 13.5% | -0.06 | 9.9%  | 26.7% | -0.28 | 16.8% | 20.2% | -0.06 |
| Antiinflammatory and antirheumatic products (on index date)              | 7.8%  | 13.5% | -0.12 | 6.3%  | 21.1% | -0.28 | 9.9%  | 17.0% | -0.14 |
| Antithrombotic agents (year up to index date)                            | 44.9% | 55.3% | -0.10 | 25.7% | 16.3% | 0.14  | 55.8% | 63.5% | -0.07 |
| Antithrombotic agents (30 days up to index date)                         | 29.9% | 43.5% | -0.16 | 21.9% | 14.7% | 0.12  | 42.1% | 51.8% | -0.10 |
| Antithrombotic agents (on index date)                                    | 28.3% | 41.8% | -0.16 | 21.3% | 13.9% | 0.12  | 35.5% | 49.7% | -0.15 |
| Beta blocking agents (year up to index date)                             | 26.9% | 28.2% | -0.02 | 13.8% | 10.3% | 0.07  | 44.4% | 47.6% | -0.03 |
| Beta blocking agents (30 days up to index date)                          | 16.8% | 23.5% | -0.11 | 12.4% | 8.7%  | 0.08  | 36.0% | 39.6% | -0.04 |
| Beta blocking agents (on index date)                                     | 15.2% | 22.9% | -0.12 | 11.9% | 8.7%  | 0.07  | 31.0% | 38.7% | -0.09 |
| Calcium channel blockers (year up to index date)                         | 23.5% | 21.2% | 0.03  | 12.4% | 7.9%  | 0.10  | 35.0% | 28.2% | 0.09  |
| Calcium channel blockers (30 days up to index date)                      | 15.0% | 17.1% | -0.04 | 10.5% | 6.7%  | 0.09  | 27.0% | 22.2% | 0.07  |

|                                                             |       |       |       |       |       |       |       |       |       |
|-------------------------------------------------------------|-------|-------|-------|-------|-------|-------|-------|-------|-------|
| Calcium channel blockers (on index date)                    | 13.4% | 15.3% | -0.04 | 10.1% | 6.2%  | 0.10  | 24.3% | 21.3% | 0.04  |
| Diuretics (year up to index date)                           | 27.6% | 34.1% | -0.08 | 24.6% | 18.2% | 0.10  | 42.6% | 46.7% | -0.04 |
| Diuretics (30 days up to index date)                        | 19.2% | 28.8% | -0.14 | 21.5% | 15.8% | 0.09  | 33.1% | 36.5% | -0.04 |
| Diuretics (on index date)                                   | 17.7% | 25.9% | -0.12 | 20.7% | 14.7% | 0.10  | 28.4% | 33.6% | -0.07 |
| Drugs for acid related disorders (year up to index date)    | 35.4% | 57.6% | -0.23 | 30.4% | 40.2% | -0.12 | 52.0% | 65.2% | -0.12 |
| Drugs for acid related disorders (30 days up to index date) | 20.6% | 47.1% | -0.32 | 22.7% | 29.3% | -0.09 | 36.2% | 53.0% | -0.18 |
| Drugs for acid related disorders (on index date)            | 17.9% | 43.5% | -0.33 | 21.5% | 26.0% | -0.07 | 28.9% | 50.7% | -0.24 |
| Immunosuppressants (year up to index date)                  | 5.6%  | 10.6% | -0.12 | 2.3%  | 2.9%  | -0.03 | 5.7%  | 5.6%  | 0.00  |
| Immunosuppressants (30 days up to index date)               | 3.9%  | 10.0% | -0.16 | 1.9%  | 2.6%  | -0.03 | 3.5%  | 4.4%  | -0.03 |
| Immunosuppressants (on index date)                          | 3.7%  | 10.0% | -0.17 | 1.7%  | 2.4%  | -0.03 | 2.6%  | 4.0%  | -0.05 |
| Insulins and analogues (year up to index date)              | 17.8% | 25.3% | -0.11 | 5.5%  | 3.3%  | 0.07  | 22.9% | 27.1% | -0.06 |
| Insulins and analogues (30 days up to index date)           | 10.9% | 19.4% | -0.15 | 4.9%  | 3.3%  | 0.06  | 18.4% | 20.3% | -0.03 |
| Insulins and analogues (on index date)                      | 9.9%  | 17.6% | -0.15 | 4.7%  | 3.1%  | 0.06  | 14.6% | 19.5% | -0.08 |
| Lipid modifying agents (year up to index date)              | 33.8% | 31.2% | 0.03  | 26.8% | 16.3% | 0.16  | 61.9% | 55.0% | 0.06  |
| Lipid modifying agents (30 days up to index date)           | 20.8% | 28.2% | -0.11 | 23.6% | 14.9% | 0.14  | 50.8% | 48.5% | 0.02  |
| Lipid modifying agents (on index date)                      | 18.7% | 25.3% | -0.10 | 23.0% | 14.4% | 0.14  | 43.8% | 47.3% | -0.04 |

CUIMC: Columbia University Irving Medical Center; HIRA: Health Insurance Review & Assessment; HM: HM Hospitales; PHD: Premier Healthcare Database; SIDIAP: The Information System for Research in Primary Care; UC HDC: University of Colorado Health Data Compass; VA OMOP: Department of Veterans Affairs. COPD: Chronic obstructive pulmonary disease; GERD: Gastroesophageal reflux disease. Exact proportions have not been reported where counts were less than 10.

## Supplementary Methods.

### Identifying a COVID-19 hospitalisation

The below tables summarise the concepts used to identify a COVID-19 hospitalisation. Alongside a hospitalisation visit, one of these codes needed to be observed. The full description of the logic used is provided at <https://atlas.ohdsi.org/#/cohortdefinition/108>. (Similarly, the full description of the logic used to identify hospitalisations with influenza is provided at <https://atlas.ohdsi.org/#/cohortdefinition/117>).

#### COVID-19 condition codes

| Id           | Name                                                                  | Vocabulary        |
|--------------|-----------------------------------------------------------------------|-------------------|
| 3731106<br>1 | Disease caused by 2019-nCoV                                           | SNOMED            |
| 3731028<br>7 | Myocarditis caused by 2019 novel coronavirus                          | SNOMED            |
| 3731028<br>6 | Infection of upper respiratory tract caused by 2019 novel coronavirus | SNOMED            |
| 3731028<br>5 | Pneumonia caused by 2019 novel coronavirus                            | SNOMED            |
| 3731028<br>4 | Encephalopathy caused by 2019 novel coronavirus                       | SNOMED            |
| 3731028<br>3 | Gastroenteritis caused by 2019 novel coronavirus                      | SNOMED            |
| 3731025<br>4 | Otitis media caused by 2019 novel coronavirus                         | SNOMED            |
| 756081       | Infection of lower respiratory tract due to COVID-19                  | OMOP<br>Extension |
| 756061       | Asymptomatic COVID-19                                                 | OMOP<br>Extension |
| 756044       | Acute respiratory distress syndrome (ARDS) due to COVID-19            | OMOP<br>Extension |
| 756039       | Respiratory infection due to COVID-19                                 | OMOP<br>Extension |
| 756031       | Bronchitis due to COVID-19                                            | OMOP<br>Extension |
| 756023       | Acute bronchitis due to COVID-19                                      | OMOP<br>Extension |

#### COVID-19 specific testing - Positive

| Id       | Name                            | Vocabulary |
|----------|---------------------------------|------------|
| 37310282 | 2019 novel coronavirus detected | SNOMED     |

**COVID-19 specific testing (note, these required a corresponding value as concept of: Detected, Positive, Positive, or Present)**

| Id       | Name                                                                                                                                           | Vocabulary     |
|----------|------------------------------------------------------------------------------------------------------------------------------------------------|----------------|
| 40218805 | Testing for SARS-CoV-2 in CDC laboratory                                                                                                       | HCPCS          |
| 40218804 | Testing for SARS-CoV-2 in non-CDC laboratory                                                                                                   | HCPCS          |
| 37310258 | Measurement of 2019 novel coronavirus antibody                                                                                                 | SNOMED         |
| 37310257 | Measurement of 2019 novel coronavirus antigen                                                                                                  | SNOMED         |
| 37310255 | Detection of 2019 novel coronavirus using polymerase chain reaction technique                                                                  | SNOMED         |
| 757686   | SARS-CoV-2 (COVID19) IgA+IgM [Presence] in Serum or Plasma by Immunoassay                                                                      | LOINC          |
| 757680   | SARS-CoV-2 (COVID19) neutralizing antibody [Presence] in Serum by pVNT                                                                         | LOINC          |
| 757679   | SARS-CoV-2 (COVID19) neutralizing antibody [Titer] in Serum by pVNT                                                                            | LOINC          |
| 757678   | SARS-CoV-2 (COVID19) N gene [Presence] in Nose by NAA with probe detection                                                                     | LOINC          |
| 757677   | SARS-CoV-2 (COVID19) RNA [Presence] in Nose by NAA with probe detection                                                                        | LOINC          |
| 756085   | Measurement of Severe acute respiratory syndrome coronavirus 2 (SARS-CoV-2) using Nucleic acid amplification technique in Respiratory specimen | OMOP Extension |
| 756084   | Measurement of Severe acute respiratory syndrome coronavirus 2 (SARS-CoV-2) using Nucleic acid amplification technique in Unspecified specimen | OMOP Extension |
| 756065   | Measurement of Severe acute respiratory syndrome coronavirus 2 (SARS-CoV-2) in Unspecified specimen                                            | OMOP Extension |
| 756055   | Measurement of Severe acute respiratory syndrome coronavirus 2 (SARS-CoV-2)                                                                    | OMOP Extension |
| 756029   | Measurement of Severe acute respiratory syndrome coronavirus 2 (SARS-CoV-2) in Respiratory specimen                                            | OMOP Extension |



|            |                                                                                                            |       |
|------------|------------------------------------------------------------------------------------------------------------|-------|
| 723<br>480 | SARS-CoV-2 (COVID19) Ab [Interpretation] in Serum or Plasma                                                | LOINC |
| 723<br>479 | SARS-CoV-2 (COVID19) IgG+IgM Ab [Presence] in Serum or Plasma by Immunoassay                               | LOINC |
| 723<br>478 | SARS-CoV-2 (COVID19) ORF1ab region [Presence] in Respiratory specimen by NAA with probe detection          | LOINC |
| 723<br>477 | SARS-CoV-2 (COVID19) Ag [Presence] in Respiratory specimen by Rapid immunoassay                            | LOINC |
| 723<br>476 | SARS-CoV-2 (COVID19) RNA [Presence] in Nasopharynx by NAA with non-probe detection                         | LOINC |
| 723<br>475 | SARS-CoV-2 (COVID19) IgM Ab [Presence] in Serum or Plasma by Immunoassay                                   | LOINC |
| 723<br>474 | SARS-CoV-2 (COVID19) IgG Ab [Presence] in Serum or Plasma by Immunoassay                                   | LOINC |
| 723<br>473 | SARS-CoV-2 (COVID19) IgA Ab [Presence] in Serum or Plasma by Immunoassay                                   | LOINC |
| 723<br>471 | SARS-CoV-2 (COVID19) RdRp gene [Cycle Threshold #] in Respiratory specimen by NAA with probe detection     | LOINC |
| 723<br>470 | SARS-CoV-2 (COVID19) RdRp gene [Cycle Threshold #] in Unspecified specimen by NAA with probe detection     | LOINC |
| 723<br>469 | SARS-CoV-2 (COVID19) ORF1ab region [Cycle Threshold #] in Respiratory specimen by NAA with probe detection | LOINC |
| 723<br>468 | SARS-CoV-2 (COVID19) S gene [Cycle Threshold #] in Unspecified specimen by NAA with probe detection        | LOINC |
| 723<br>467 | SARS-CoV-2 (COVID19) S gene [Cycle Threshold #] in Respiratory specimen by NAA with probe detection        | LOINC |
| 723<br>466 | SARS-CoV-2 (COVID19) S gene [Presence] in Unspecified specimen by NAA with probe detection                 | LOINC |
| 723<br>465 | SARS-CoV-2 (COVID19) S gene [Presence] in Respiratory specimen by NAA with probe detection                 | LOINC |
| 723<br>464 | SARS-CoV-2 (COVID19) ORF1ab region [Presence] in Unspecified specimen by NAA with probe detection          | LOINC |
| 723<br>463 | SARS-CoV-2 (COVID19) RNA [Presence] in Serum or Plasma by NAA with probe detection                         | LOINC |
| 723<br>459 | SARS-CoV-2 (COVID19) IgA Ab [Units/volume] in Serum or Plasma by Immunoassay                               | LOINC |
| 715<br>272 | SARS-CoV-2 (COVID19) N gene [Presence] in Nasopharynx by NAA with probe detection                          | LOINC |
| 715<br>262 | SARS-CoV-2 (COVID19) RNA [Log #/volume] (viral load) in Unspecified specimen by NAA with probe detection   | LOINC |
| 715<br>261 | SARS-CoV-2 (COVID19) RNA [Presence] in Saliva (oral fluid) by Sequencing                                   | LOINC |
| 715<br>260 | SARS-CoV-2 (COVID19) RNA [Presence] in Saliva (oral fluid) by NAA with probe detection                     | LOINC |
| 706<br>181 | SARS-CoV-2 (COVID19) IgG Ab [Presence] in Serum, Plasma or Blood by Rapid immunoassay                      | LOINC |
| 706<br>180 | SARS-CoV-2 (COVID19) IgM Ab [Presence] in Serum, Plasma or Blood by Rapid immunoassay                      | LOINC |
| 706<br>179 | SARS-CoV-2 (COVID19) Ab panel - Serum or Plasma by Immunoassay                                             | LOINC |

|            |                                                                                                                                            |                       |
|------------|--------------------------------------------------------------------------------------------------------------------------------------------|-----------------------|
| 706<br>178 | SARS-CoV-2 (COVID19) IgM Ab [Units/volume] in Serum or Plasma by Immunoassay                                                               | LOINC                 |
| 706<br>177 | SARS-CoV-2 (COVID19) IgG Ab [Units/volume] in Serum or Plasma by Immunoassay                                                               | LOINC                 |
| 706<br>176 | SARS-CoV-2 (COVID19) IgG and IgM panel - Serum, Plasma or Blood by Rapid immunoassay                                                       | LOINC                 |
| 706<br>175 | SARS-CoV-2 (COVID19) N gene [Presence] in Unspecified specimen by NAA with probe detection                                                 | LOINC                 |
| 706<br>174 | SARS-CoV-2 (COVID19) E gene [Presence] in Unspecified specimen by NAA with probe detection                                                 | LOINC                 |
| 706<br>173 | SARS-CoV-2 (COVID19) RdRp gene [Presence] in Unspecified specimen by NAA with probe detection                                              | LOINC                 |
| 706<br>170 | SARS-CoV-2 (COVID19) RNA [Presence] in Unspecified specimen by NAA with probe detection                                                    | LOINC                 |
| 706<br>169 | SARS-CoV-2 (COVID19) RNA panel - Unspecified specimen by NAA with probe detection                                                          | LOINC                 |
| 706<br>168 | SARS-CoV-2 (COVID19) ORF1ab region [Cycle Threshold #] in Unspecified specimen by NAA with probe detection                                 | LOINC                 |
| 706<br>167 | SARS-CoV-2 (COVID19) N gene [Cycle Threshold #] in Unspecified specimen by NAA with probe detection                                        | LOINC                 |
| 706<br>166 | SARS-CoV-2 (COVID19) E gene [Cycle Threshold #] in Unspecified specimen by NAA with probe detection                                        | LOINC                 |
| 706<br>163 | SARS-CoV-2 (COVID19) RNA [Presence] in Respiratory specimen by NAA with probe detection                                                    | LOINC                 |
| 706<br>161 | SARS-CoV-2 (COVID19) N gene [Presence] in Respiratory specimen by NAA with probe detection                                                 | LOINC                 |
| 706<br>160 | SARS-CoV-2 (COVID19) RdRp gene [Presence] in Respiratory specimen by NAA with probe detection                                              | LOINC                 |
| 706<br>158 | SARS-CoV-2 (COVID19) RNA panel - Respiratory specimen by NAA with probe detection                                                          | LOINC                 |
| 706<br>157 | SARS-CoV-2 (COVID19) N gene [Cycle Threshold #] in Unspecified specimen by Nucleic acid amplification using CDC primer-probe set N1        | LOINC                 |
| 706<br>156 | SARS-CoV-2 (COVID19) N gene [Presence] in Unspecified specimen by Nucleic acid amplification using CDC primer-probe set N1                 | LOINC                 |
| 706<br>155 | SARS-CoV-2 (COVID19) N gene [Cycle Threshold #] in Unspecified specimen by Nucleic acid amplification using CDC primer-probe set N2        | LOINC                 |
| 706<br>154 | SARS-CoV-2 (COVID19) N gene [Presence] in Unspecified specimen by Nucleic acid amplification using CDC primer-probe set N2                 | LOINC                 |
| 705<br>107 | Measurement of Severe acute respiratory syndrome coronavirus 2 (SARS-CoV-2) in Sample from nose                                            | OMOP<br>Extensi<br>on |
| 705<br>106 | Measurement of Severe acute respiratory syndrome coronavirus 2 (SARS-CoV-2) using Nucleic acid amplification technique in Sample from nose | OMOP<br>Extensi<br>on |
| 705<br>001 | Measurement of Severe acute respiratory syndrome coronavirus 2 (SARS-CoV-2) using Nucleic acid amplification technique                     | OMOP<br>Extensi<br>on |
| 705<br>000 | Measurement of Severe acute respiratory syndrome coronavirus 2 (SARS-CoV-2) using Nucleic acid amplification technique in Blood            | OMOP<br>Extensi<br>on |

|            |                                                                                                                                                                                   |                       |
|------------|-----------------------------------------------------------------------------------------------------------------------------------------------------------------------------------|-----------------------|
| 704<br>993 | Measurement of Severe acute respiratory syndrome coronavirus 2 (SARS-CoV-2) using Sequencing                                                                                      | OMOP<br>Extensi<br>on |
| 704<br>992 | Measurement of Severe acute respiratory syndrome coronavirus 2 (SARS-CoV-2) using Culture method                                                                                  | OMOP<br>Extensi<br>on |
| 704<br>991 | Measurement of Severe acute respiratory syndrome coronavirus 2 (SARS-CoV-2) in Blood                                                                                              | OMOP<br>Extensi<br>on |
| 700<br>360 | Infectious agent detection by nucleic acid (DNA or RNA); severe acute respiratory syndrome coronavirus 2 (SARS-CoV-2) (Coronavirus disease [COVID-19]), amplified probe technique | CPT4                  |
| 586<br>529 | SARS-CoV-2 (COVID19) RNA [Cycle Threshold #] in Unspecified specimen by NAA with probe detection                                                                                  | LOINC                 |
| 586<br>528 | SARS-CoV-2 (COVID19) RNA [Cycle Threshold #] in Respiratory specimen by NAA with probe detection                                                                                  | LOINC                 |
| 586<br>527 | SARS-CoV-2 (COVID19) IgG Ab [Presence] in DBS by Immunoassay                                                                                                                      | LOINC                 |
| 586<br>526 | SARS-CoV-2 (COVID19) RNA [Presence] in Nasopharynx by NAA with probe detection                                                                                                    | LOINC                 |
| 586<br>525 | SARS-CoV-2 (COVID19) N gene [Presence] in Respiratory specimen by Nucleic acid amplification using CDC primer-probe set N2                                                        | LOINC                 |
| 586<br>524 | SARS-CoV-2 (COVID19) N gene [Presence] in Respiratory specimen by Nucleic acid amplification using CDC primer-probe set N1                                                        | LOINC                 |
| 586<br>523 | SARS-CoV-2 (COVID19) E gene [Presence] in Respiratory specimen by NAA with probe detection                                                                                        | LOINC                 |
| 586<br>522 | SARS-CoV-2 (COVID19) Ab [Units/volume] in Serum or Plasma by Immunoassay                                                                                                          | LOINC                 |
| 586<br>521 | SARS-CoV-2 (COVID19) IgA Ab [Presence] in Serum, Plasma or Blood by Rapid immunoassay                                                                                             | LOINC                 |
| 586<br>520 | SARS-CoV-2 (COVID19) N gene [Presence] in Serum or Plasma by NAA with probe detection                                                                                             | LOINC                 |
| 586<br>519 | SARS-CoV-2 (COVID19) S gene [Presence] in Serum or Plasma by NAA with probe detection                                                                                             | LOINC                 |
| 586<br>518 | SARS-CoV-2 (COVID19) E gene [Presence] in Serum or Plasma by NAA with probe detection                                                                                             | LOINC                 |
| 586<br>517 | SARS-CoV-2 (COVID19) whole genome [Nucleotide sequence] in Isolate by Sequencing                                                                                                  | LOINC                 |
| 586<br>516 | SARS-CoV-2 (COVID19) [Presence] in Unspecified specimen by Organism specific culture                                                                                              | LOINC                 |
| 586<br>515 | SARS-CoV-2 (COVID19) Ab [Presence] in Serum or Plasma by Immunoassay                                                                                                              | LOINC                 |
| 586<br>310 | Measurement of Severe acute respiratory syndrome coronavirus 2 (SARS-CoV-2) Genetic material using Molecular method                                                               | OMOP<br>Extensi<br>on |
| 586<br>309 | Measurement of Severe acute respiratory syndrome coronavirus 2 (SARS-CoV-2) in Specified specimen                                                                                 | OMOP<br>Extensi<br>on |
| 586<br>308 | Measurement of Severe acute respiratory syndrome coronavirus 2 (SARS-CoV-2) using Nucleic acid amplification technique in Saliva                                                  | OMOP<br>Extensi<br>on |

|            |                                                                                       |                       |
|------------|---------------------------------------------------------------------------------------|-----------------------|
| 586<br>307 | Measurement of Severe acute respiratory syndrome coronavirus 2 (SARS-CoV-2) in Saliva | OMOP<br>Extensi<br>on |
|------------|---------------------------------------------------------------------------------------|-----------------------|

**COVID-19 source codes**

| Id            | Name                                                                                       | Vocabul<br>ary |
|---------------|--------------------------------------------------------------------------------------------|----------------|
| 4575609<br>3  | Emergency use of U07.1   COVID-19, virus identified                                        | ICD10          |
| 4560047<br>1* | Other coronavirus as the cause of diseases classified elsewhere                            | ICD10C<br>M    |
| 4250111<br>5  | Emergency use of U07.1   Disease caused by severe acute respiratory syndrome coronavirus 2 | KCD7           |
| 710160        | Emergency use of U07.1   COVID-19, virus identified                                        | ICD10CN        |
| 710159        | COVID-19, excluding pneumonia                                                              | ICD10CN        |
| 710158        | COVID-19                                                                                   | ICD10CN        |
| 710156        | COVID-19 pneumonia                                                                         | ICD10CN        |
| 710155        | COVID-19 pneumonia                                                                         | ICD10CN        |
| 586415*       | Provisional assignment of new diseases or emergency use                                    | KCD7           |
| 586414*       | Novel coronavirus infection                                                                | KCD7           |

\*Omitted for CUIMC to avoid including non-COVID-19 patients.
